# Supplementary material for: Predatory Strategies of Myxococcus xanthus: Prey Susceptibility to OMVs and Moonlighting Enzymes
Source: MDPI journal article supplement (doi:10.3390/microorganisms11040874), 2023-03-29
Supplement: s1 [file s1]

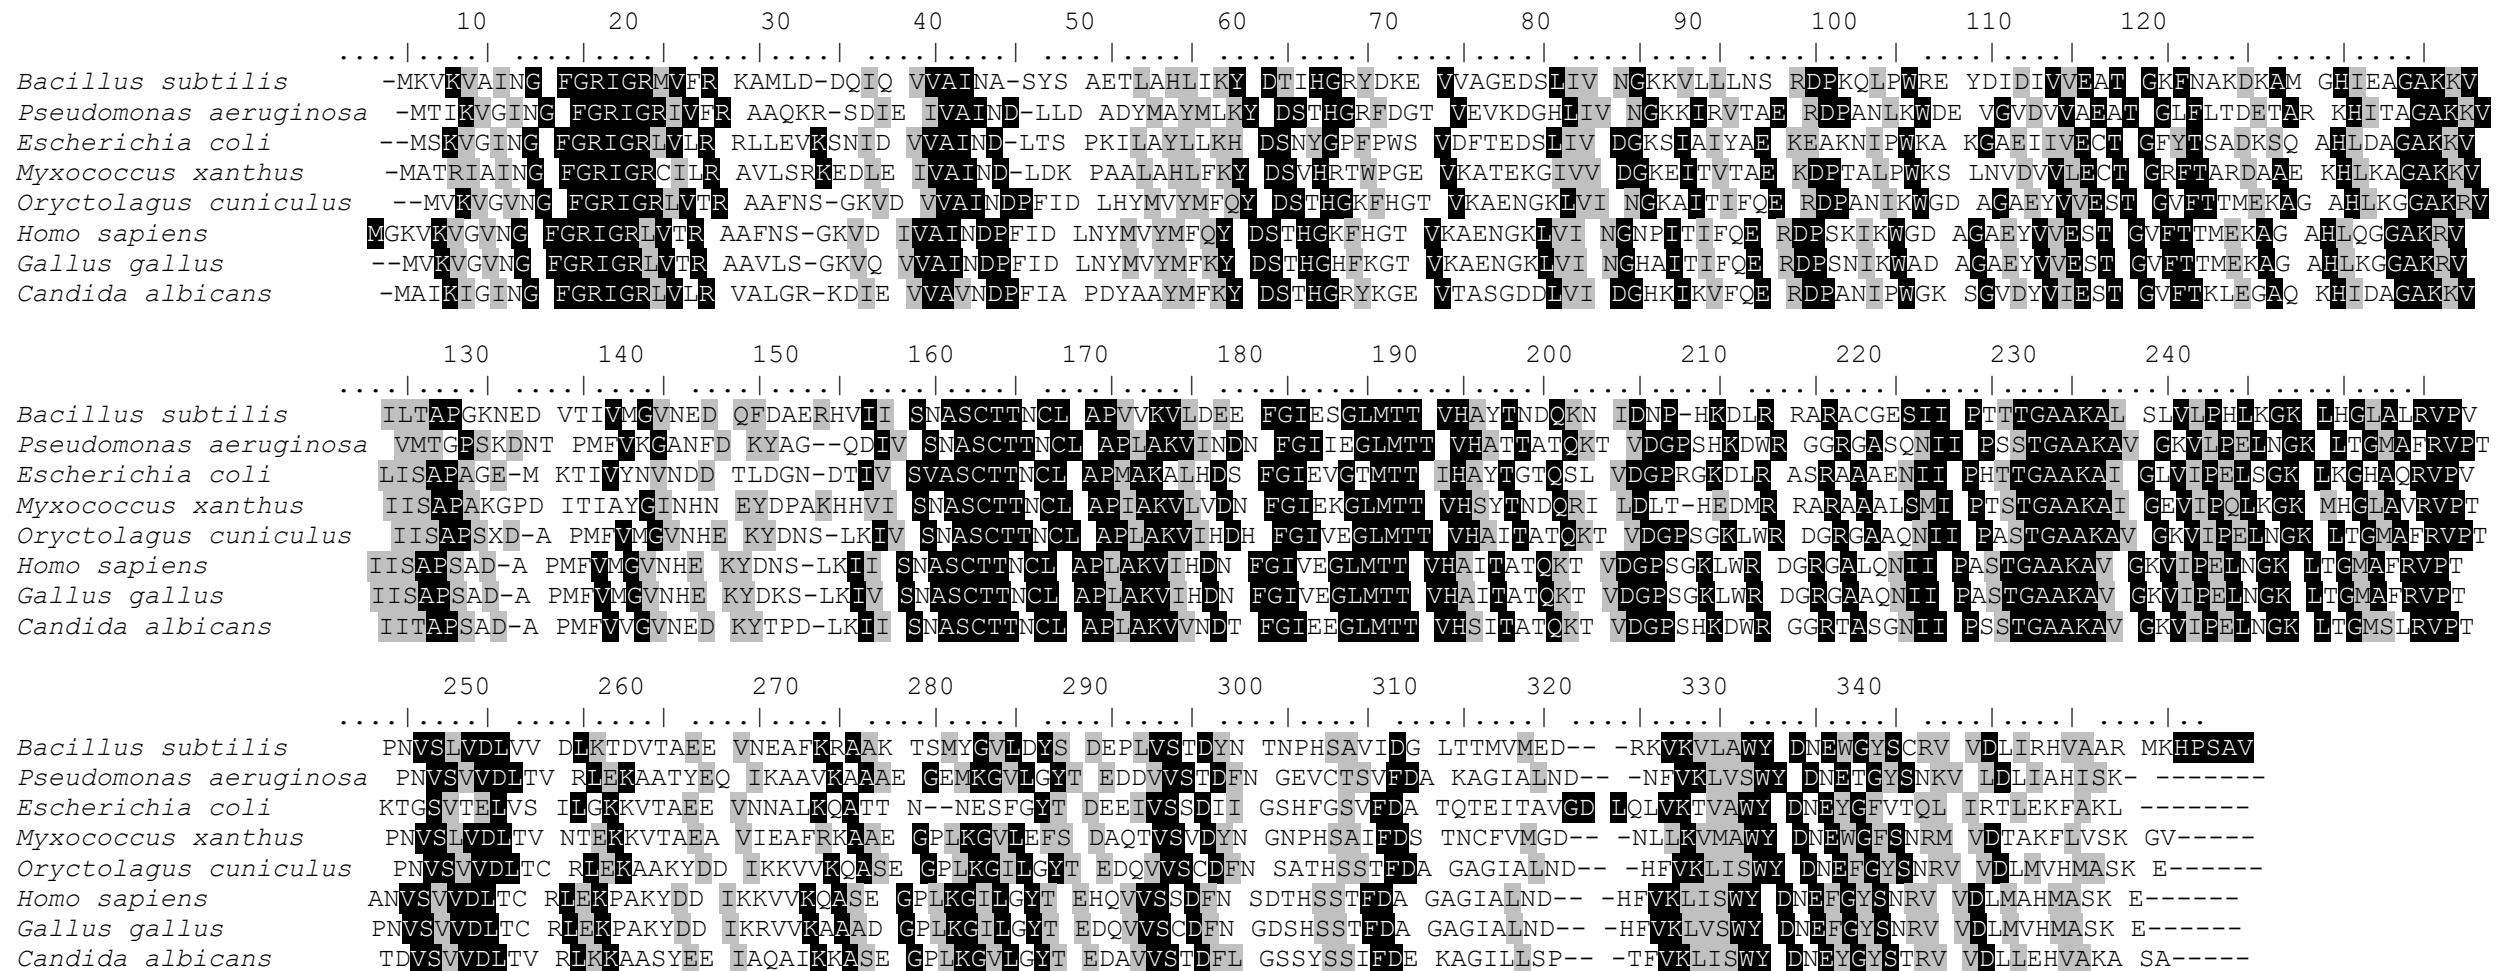

**Supplementary Figure S3.** Alignment of GAPDH sequences from a variety of prokaryotes and eukaryotes. Columns are shaded if residues have conservation identity (black) or similarity (grey) exceeding 85% according to the BLOSUM 62 substitution matrix.
