# Supplementary material for: Predatory Strategies of Myxococcus xanthus: Prey Susceptibility to OMVs and Moonlighting Enzymes
Source: MDPI journal article supplement (doi:10.3390/microorganisms11040874), 2023-03-29
Supplement: s1 [file s1]

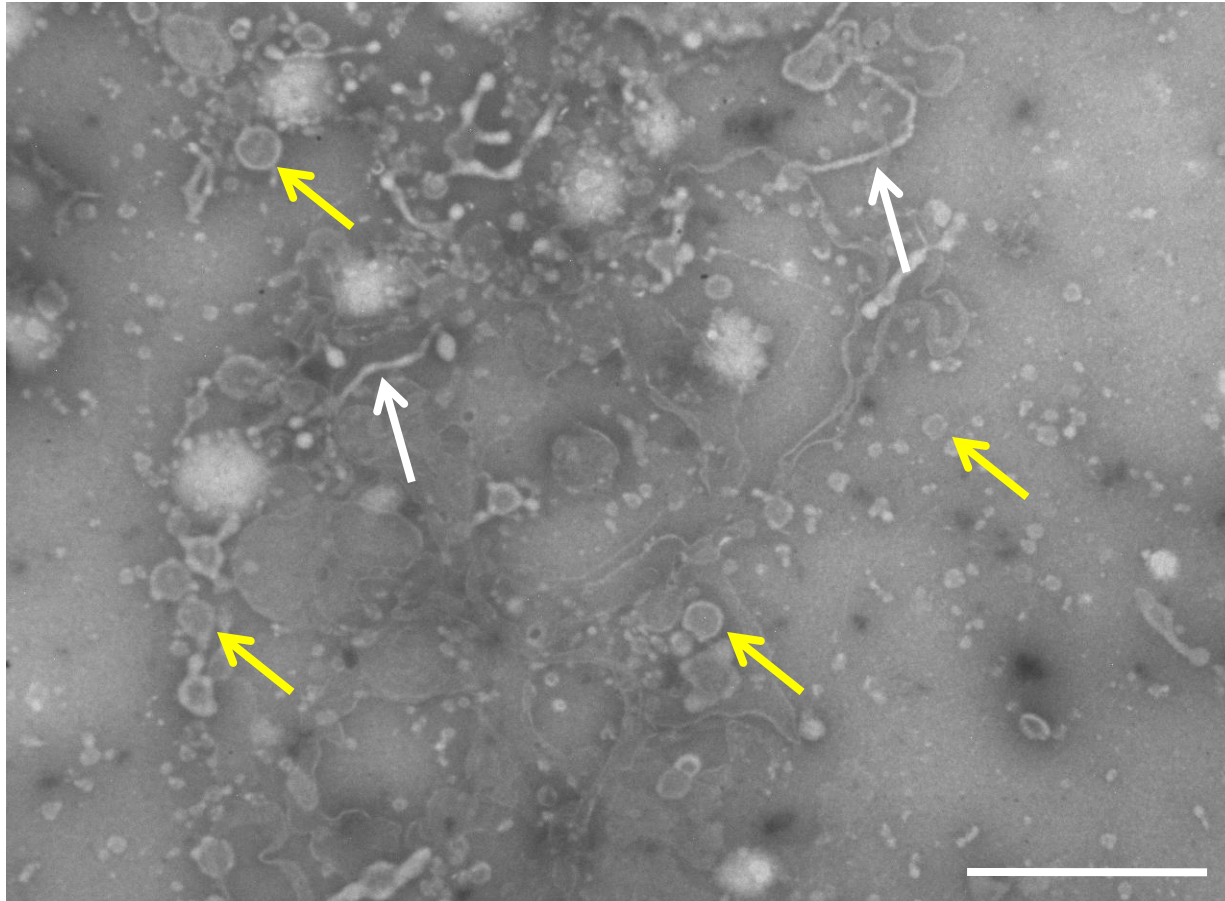

**Supplementary Figure S2.** Transmission electron micrograph of OMVs purified by differential centrifugation. Example OMVs are shown with yellow arrows. Linear features (white arrows) are possibly outer membrane chains or tubes. Bar = 1  $\mu$ m.
