# Supplementary material for: Predatory Strategies of Myxococcus xanthus: Prey Susceptibility to OMVs and Moonlighting Enzymes
Source: MDPI journal article supplement (doi:10.3390/microorganisms11040874), 2023-03-29
Supplement: s1 [file s1]

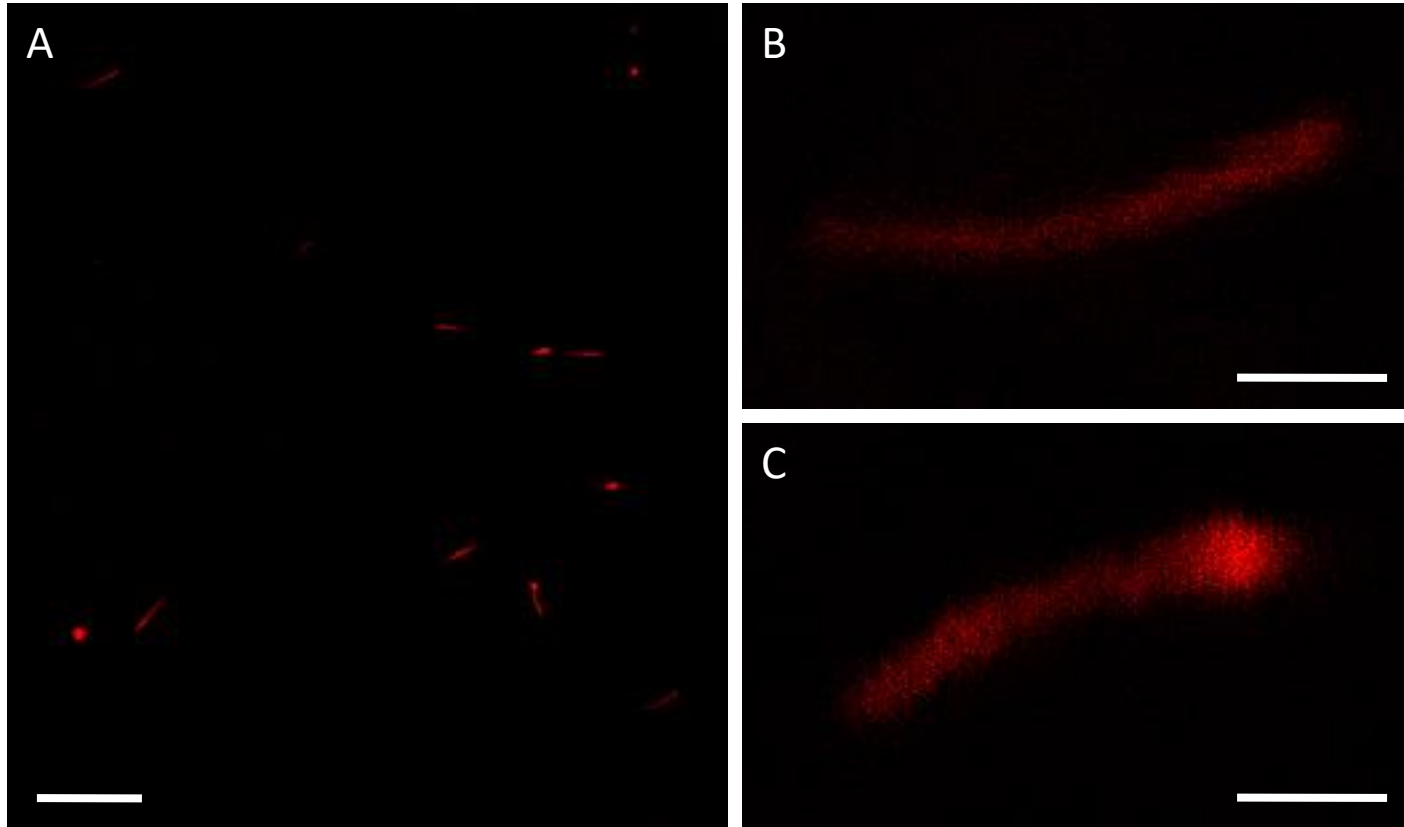

**Supplementary Figure S1.** Fluorescence images of EH715 cells. A-C: Laser confocal microscope images of EH715 cells expressing mCherry (excitation at 560 nm, emission at 620 nm). Bar is 20  $\mu\text{m}$  in panel A and 2  $\mu\text{m}$  in panels B and C.
